# Supplementary material
Source: PubMed Central journal article supplement (PMC4101151)
Supplement: NIHMS593938-supplement-01.pdf [file NIHMS593938-supplement-01.pdf]

## **Supplemental Inventory**

Table S1: Mean, standard error (SEM), coefficient of variation (CoV) and the number (n) of mice analyzed for retinal cell number, for each strain. The raw data in this table were used for both Figure 1 and Figure 2 in the main text.

| KEY      | Mean SEM CoV n |           |           |           |           |           |           |           |           |           |           |           |           |           |           |           |           |           |           |           |           |           |           |           |           |           |           |           |           |           |
|----------|----------------|-----------|-----------|-----------|-----------|-----------|-----------|-----------|-----------|-----------|-----------|-----------|-----------|-----------|-----------|-----------|-----------|-----------|-----------|-----------|-----------|-----------|-----------|-----------|-----------|-----------|-----------|-----------|-----------|-----------|
|          | B6/J           | A/J       | ABF1      | BAF1      | AXB1      | AXB2      | AXB4      | AXB5      | AXB6      | AXB8      | AXB10     | AXB12     | AXB13     | AXB15     | AXB19     | AXB23     | AXB24     | BXA1      | BXA2      | BXA4      | BXA7      | BXA8      | BXA11     | BXA12     | BXA13     | BXA14     | BXA16     | BXA24     | BXA25     | BXA26     |
| Rod      | 7,624,090      | 6,051,100 | 7,925,098 | 8,011,443 | 7,326,260 | 7,767,360 | 6,706,160 | 7,491,880 | 7,835,600 | 6,979,470 | 7,648,500 | 7,052,620 | 7,434,540 | 7,883,430 | 7,389,330 | 7,831,060 | 7,084,880 | 7,506,880 | 7,675,780 | 7,287,480 | 6,975,690 | 7,737,650 | 7,266,850 | 8,227,260 | 7,483,600 | 7,035,830 | 6,840,580 | 7,659,890 | 6,841,160 | 7,209,040 |
|          | 106.813        | 168.898   | 230.914   | 119.619   | 80,204    | 71,769    | 143,894   | 85,194    | 72,028    | 97,114    | 103,959   | 228,675   | 89,807    | 86,133    | 97,723    | 67,352    | 377,156   | 68,057    | 103,673   | 170,649   | 107,601   | 185,602   | 90,458    | 51,473    | 61,004    | 185,223   | 238,534   | 142,123   | 151,891   | 122,706   |
|          | 0.040          | 0.074     | 0.058     | 0.040     | 0.022     | 0.018     | 0.037     | 0.023     | 0.018     | 0.028     | 0.027     | 0.065     | 0.024     | 0.019     | 0.026     | 0.017     | 0.092     | 0.018     | 0.027     | 0.047     | 0.031     | 0.048     | 0.025     | 0.013     | 0.016     | 0.053     | 0.070     | 0.032     | 0.044     | 0.034     |
| Cone     | 196,897        | 116,158   |           |           | 135,667   | 129,923   | 143,877   | 148,458   | 140,256   | 148,949   | 151,733   | 160,307   | 179,683   | 141,470   | 142,030   | 204,419   | 126,822   | 176,265   | 139,588   | 147,354   | 168,176   | 157,423   | 164,010   | 160,228   | 154,970   | 157,446   | 135,274   | 156,439   | 165,138   | 144,692   |
|          | 5,435          | 2,737     |           |           | 3,958     | 4,311     | 3,507     | 5,525     | 3,755     | 2,975     | 3,274     | 1,641     | 3,426     | 3,063     | 5,773     | 5,532     | 3,219     | 3,316     | 4,626     | 4,833     | 2,776     | 3,595     | 3,915     | 3,390     | 2,767     | 13,672    | 4,761     | 5,504     | 2,908     | 4,993     |
|          | 0.055          | 0.075     |           |           | 0.058     | 0.057     | 0.060     | 0.091     | 0.046     | 0.049     | 0.053     | 0.018     | 0.047     | 0.053     | 0.100     | 0.061     | 0.062     | 0.046     | 0.057     | 0.046     | 0.033     | 0.051     | 0.058     | 0.052     | 0.040     | 0.150     | 0.086     | 0.093     | 0.035     | 0.077     |
| HC       | 18,471         | 9,884     |           | 14,417    | 14,136    | 13,372    | 13,348    | 15,441    | 13,472    | 13,460    | 17,343    | 13,724    | 13,210    | 17,857    | 14,116    | 15,077    | 13,129    | 15,712    | 13,582    | 16,699    | 15,133    | 14,778    | 13,945    | 16,455    | 18,538    | 18,942    | 15,097    | 12,715    | 16,619    | 13,860    |
|          | 288            | 168       |           | 263       | 192       | 259       | 277       | 296       | 216       | 214       | 380       | 267       | 249       | 107       | 169       | 284       | 482       | 368       | 15        | 221       | 179       | 271       | 393       | 475       | 72        | 253       | 275       | 132       | 238       | 302       |
|          | 0.044          | 0.045     |           | 0.036     | 0.027     | 0.043     | 0.041     | 0.038     | 0.032     | 0.028     | 0.044     | 0.039     | 0.033     | 0.012     | 0.021     | 0.033     | 0.073     | 0.041     | 0.002     | 0.027     | 0.024     | 0.037     | 0.056     | 0.050     | 0.008     | 0.027     | 0.032     | 0.021     | 0.029     | 0.038     |
| RBC      | 213,873        | 209,009   | 244,523   | 240,957   | 251,177   | 225,740   | 205,137   | 235,566   |           | 208,742   | 235,140   | 242,005   | 212,694   | 202,415   | 211,652   | 237,294   |           | 226,916   | 227,262   | 239,211   | 254,176   | 238,863   | 224,397   | 244,927   | 233,122   | 227,040   | 242,530   | 252,859   | 235,811   | 229,224   |
|          | 6,595          | 4,707     | 6,286     | 3,425     | 5,711     | 3,322     | 4,450     | 4,064     |           | 2,782     | 7,368     | 4,530     | 6,419     | 7,577     | 5,307     | 3,524     |           | 4,635     | 4,955     | 5,713     | 4,231     | 2,141     | 2,012     | 2,130     | 4,230     | 5,692     | 6,255     | 4,920     | 10,808    | 7,837     |
|          | 0.082          | 0.060     | 0.057     | 0.040     | 0.045     | 0.029     | 0.043     | 0.035     |           | 0.027     | 0.063     | 0.037     | 0.060     | 0.075     | 0.050     | 0.030     |           | 0.041     | 0.044     | 0.048     | 0.033     | 0.018     | 0.018     | 0.015     | 0.036     | 0.050     | 0.052     | 0.039     | 0.092     | 0.068     |
| CBC2     | 55,275         | 47,878    | 56,538    | 60,570    | 59,920    | 54,709    | 47,126    | 55,382    | 49,167    | 44,592    | 53,461    | 60,160    | 56,183    | 50,685    | 51,078    | 54,657    | 53,480    | 58,914    | 52,714    | 41,908    | 58,722    | 50,924    | 52,277    | 60,051    | 54,730    | 51,256    | 58,666    | 53,346    | 49,150    | 52,616    |
|          | 895            | 1,548     | 669       | 1,264     | 691       | 509       | 1,293     | 667       | 1,867     | 849       | 371       | 1,730     | 1,100     | 981       | 1,246     | 995       | 667       | 1,812     | 2,292     | 1,285     | 1,347     | 710       | 1,494     | 800       | 2,648     | 1,057     | 1,530     | 801       | 1,647     | 1,194     |
|          | 0.043          | 0.086     | 0.026     | 0.063     | 0.023     | 0.019     | 0.055     | 0.024     | 0.076     | 0.038     | 0.014     | 0.058     | 0.034     | 0.039     | 0.049     | 0.036     | 0.025     | 0.062     | 0.087     | 0.053     | 0.046     | 0.028     | 0.057     | 0.027     | 0.097     | 0.041     | 0.052     | 0.030     | 0.058     | 0.045     |
| CBC3b    | 58,722         | 57,365    | 74,048    | 72,069    | 50,243    | 56,065    | 52,842    | 61,018    | 63,559    | 64,353    | 67,046    | 56,212    | 62,334    | 67,424    | 57,878    | 62,274    |           | 67,240    | 61,374    | 68,017    | 65,496    | 60,189    | 56,275    | 80,469    | 73,720    | 67,734    | 55,513    | 59,476    | 66,369    | 64,614    |
|          | 849            | 2,596     | 1,511     | 1,147     | 1,734     | 3,942     | 2,010     | 1,367     | 148       | 842       | 301       | 898       | 2,669     | 938       | 2,564     | 2,318     |           | 1,826     | 3,239     | 889       | 4,205     | 454       | 1,696     | 1,346     | 2,788     | 228       | 529       | 1,679     | 1,891     | 571       |
|          | 0.038          | 0.090     | 0.046     | 0.045     | 0.069     | 0.122     | 0.076     | 0.039     | 0.004     | 0.026     | 0.009     | 0.032     | 0.074     | 0.028     | 0.089     | 0.064     |           | 0.054     | 0.091     | 0.026     | 0.111     | 0.013     | 0.060     | 0.033     | 0.066     | 0.007     | 0.016     | 0.056     | 0.049     | 0.013     |
| CBC4     | 36,940         | 31,772    | 48,895    | 49,109    | 33,746    | 50,260    | 35,352    | 35,270    | 46,106    | 41,745    | 44,294    | 36,657    | 49,825    | 44,640    | 47,749    | 39,517    | 34,491    | 41,946    | 47,010    | 35,703    | 41,245    | 44,888    | 33,652    | 37,444    | 42,439    | 29,351    | 38,483    | 42,897    | 36,076    | 39,836    |
|          | 764            | 1,734     | 1,927     | 1,229     | 1,035     | 841       | 733       | 1,680     | 1,458     | 574       | 1,530     | 1,352     | 1,556     | 818       | 1,563     | 1,339     | 911       | 1,444     | 291       | 1,949     | 1,440     | 530       | 648       | 1,695     | 2,010     | 1,547     | 1,463     | 1,671     | 679       | 1,802     |
|          | 0.055          | 0.144     | 0.079     | 0.061     | 0.061     | 0.033     | 0.041     | 0.095     | 0.055     | 0.028     | 0.069     | 0.074     | 0.062     | 0.037     | 0.065     | 0.068     | 0.053     | 0.069     | 0.012     | 0.109     | 0.060     | 0.024     | 0.039     | 0.091     | 0.095     | 0.091     | 0.076     | 0.078     | 0.038     | 0.078     |
| AII      | 69,223         | 64,777    | 80,882    | 82,050    | 67,333    | 80,783    | 60,763    | 64,964    | 60,318    | 68,055    | 65,691    | 73,206    | 67,613    | 73,397    | 64,230    | 72,024    | 63,931    | 65,905    | 86,557    | 72,117    | 62,968    | 82,766    | 69,444    | 74,842    | 85,984    | 65,345    | 75,398    | 83,781    | 59,772    | 57,141    |
|          | 1,566          | 1,517     | 804       | 1,309     | 1,404     | 2,720     | 2,682     | 1,010     | 1,134     | 1,532     | 1,123     | 861       | 2,890     | 888       | 2,148     | 1,997     | 858       | 1,562     | 1,602     | 1,625     | 1,903     | 909       | 2,766     | 2,270     | 2,125     | 1,120     | 1,419     | 1,486     | 1,475     | 334       |
|          | 0.060          | 0.062     | 0.022     | 0.048     | 0.042     | 0.067     | 0.088     | 0.031     | 0.038     | 0.045     | 0.034     | 0.024     | 0.074     | 0.024     | 0.067     | 0.055     | 0.027     | 0.047     | 0.037     | 0.039     | 0.060     | 0.019     | 0.080     | 0.061     | 0.049     | 0.034     | 0.038     | 0.035     | 0.049     | 0.012     |
| DA       | 616.7          | 219.2     | 509.3     | 505.0     | 456.3     | 498.6     | 487.3     | 349.5     | 281.5     | 553.0     | 495.5     | 160.0     | 404.0     | 436.8     | 601.8     | 539.3     | 485.5     | 614.3     | 395.0     | 522.5     | 451.8     | 581.0     | 437.0     | 636.7     | 453.8     | 323.7     | 586.3     |           | 458.0     | 336.8     |
|          | 8.3            | 3.4       | 7.4       | 4.8       | 7.4       | 9.6       | 9.9       | 4.2       | 15.4      | 4.8       | 1.0       | 20.0      | 6.5       | 3.1       | 7.5       | 3.5       | 4.0       | 7.4       | 12.6      | 13.9      | 1.8       | 6.2       | 10.3      | 4.3       | 15.0      | 21.7      | 11.7      |           | 4.9       | 9.1       |
|          | 0.036          | 0.034     | 0.025     | 0.019     | 0.033     | 0.051     | 0.041     | 0.024     | 0.134     | 0.017     | 0.004     | 0.251     | 0.032     | 0.016     | 0.025     | 0.013     | 0.019     | 0.024     | 0.078     | 0.053     | 0.008     | 0.021     | 0.047     | 0.012     | 0.066     | 0.116     | 0.040     | 0.021     | 0.054     |           |
| VGlut3   | 12,264         | 10,644    | 13,735    | 13,533    | 12,079    | 13,850    | 11,925    | 11,242    | 10,786    | 11,575    | 14,735    | 13,270    | 11,368    | 12,139    | 11,317    | 12,286    | 12,282    | 13,182    | 13,860    | 11,798    | 13,234    | 11,875    | 14,012    | 14,857    | 13,471    | 11,692    | 12,371    | 13,846    | 10,415    | 11,203    |
|          | 167            | 277       | 10.6      | 173       | 235       | 174       | 226       | 117       | 179       | 187       | 348       | 88        | 87        | 291       | 273       | 71        | 202       | 75        | 199       | 128       | 208       | 143       | 278       | 218       | 233       | 203       | 305       | 148       | 82        | 294       |
|          | 0.036          | 0.058     | 0.002     | 0.031     | 0.039     | 0.025     | 0.038     | 0.021     | 0.029     | 0.032     | 0.047     | 0.013     | 0.015     | 0.048     | 0.048     | 0.012     | 0.033     | 0.011     | 0.029     | 0.022     | 0.031     | 0.024     | 0.040     | 0.025     | 0.035     | 0.030     | 0.049     | 0.021     | 0.016     | 0.045     |
| ChAT INL | 19,539         | 14,506    | 18,453    | 20,195    | 19,671    | 19,377    | 17,419    | 16,505    | 19,365    | 17,028    | 16,570    | 19,168    | 17,164    | 17,349    | 18,197    | 17,748    | 18,525    | 16,896    | 19,099    | 17,783    | 21,937    | 21,363    | 16,337    | 19,325    | 17,796    | 17,747    | 18,089    |           | 19,285    | 22,304    |
|          | 216            | 120       | 311       | 200       | 281       | 207       | 279       | 534       | 478       | 523       | 233       | 450       | 774       | 435       | 359       | 250       | 634       | 476       | 261       | 254       | 356       | 644       | 273       | 756       | 144       | 422       | 223       |           | 460       | 118       |
|          | 0.029          | 0.023     | 0.029     | 0.020     | 0.029     | 0.026     | 0.028     | 0.065     | 0.060     | 0.061     | 0.028     | 0.047     | 0.090     | 0.056     | 0.034     | 0.028     | 0.077     | 0.056     | 0.033     | 0.029     | 0.032     | 0.060     | 0.033     | 0.068     | 0.016     | 0.041     | 0.025     |           | 0.048     | 0.011     |
| ChAT GCL | 16,880         | 12,434    | 16,833    | 16,319    | 15,347    | 16,900    | 14,713    | 15,205    | 16,255    | 14,466    | 13,581    | 16,662    | 14,450    | 15,849    | 16,460    | 15,150    | 15,446    | 14,927    | 15,596    | 15,082    | 16,558    | 17,603    | 14,600    | 18,414    | 15,860    | 14,576    | 15,609    |           | 16,726    | 17,631    |
|          | 232            | 105       | 26        | 470       | 457       | 94        | 277       | 250       | 314       | 379       | 467       | 341       | 352       | 315       | 613       | 303       | 439       | 284       | 216       | 360       | 363       | 222       | 142       | 603       | 303       | 85        | 371       |           | 241       | 395       |
|          | 0.037          | 0.024     | 0.003     | 0.058     | 0.060     | 0.014     | 0.033     | 0.033     | 0.047     | 0.052     | 0.069     | 0.04      |           |           |           |           |           |           |           |           |           |           |           |           |           |           |           |           |           |           |
